# Supplementary material
Source: publisher figshare collection journal article supplement (https://acs.figshare.com/ndownloader/files/9958837)
Supplement: Supplementary file 1 [file 9958837]

Compound #,Compound Structure,CBP HTRF IC50 (nM),BRD4(1) HTRF IC50 (nM),BRD9 HTRF IC50 (nM),CECR2 HTRF IC50 (nM),Mouse Liver Microsome Stability Clhep (mL/min/kg),Rat Liver Microsome Stability Clhep (mL/min/kg),Human Liver Microsome Stability Clhep (mL/min/kg),MYC EC50 (nM)
1,CC(=O)N1CCc2[nH]nc(c2C1)Nc1ccccc1,620,"60,000",,,,,,
2,CC(=O)N1CCc2c(c(nn2[C@H]2CCOC2)Nc2ccc(cc2F)-c2cnn(c2)C)C1,20,"13,000",,,,,,
3,CNC(=O)N1CCc2c(c(nn2C2CCOCC2)N2CCCc3cc(c(cc32)C(F)F)-c2cnn(c2)C)C1,0.94,"5,100",,,,,,
4,C[C@@H]1CC(NC2=CC=CC(C3=CC=C(N(C)N=C4C5=CN(C)N=C5)C4=C3)=C2N1)=O,30,"11,000",730,"7,700",,,,
5,C[C@@H]1CC(=O)Nc2cccc(c2N1)N1CCCc2cc(c(cc21)C(F)F)-c1cnn(c1)C,3.4,"4,500",">20,000",">20,000",,,,
6,O=C(OC)C1=CNC2=CC=CC=C21,"99,000",">100,000",,,,,,
7,CN1C(=O)Sc2cc(ccc21)N,">100,000",">100,000",,,,,,
8,CCOC(=O)c1cnc2ccc(cc2c1Nc1cccc(c1)C(=O)O)C(=O)OC,230,">20,000",,,,,,
9,CC(=O)N1CCC2=C(C1)C=C(C(=O)N2CC1CC1)c1cccc(c1)Cl,540,"52,000",,,,,,
10,CN1C(=O)CCc2cc(ccc21)NS(=O)(=O)c1ccc(s1)C,"23,000","5,200",,,,,,
11,CNC(=O)Nc1cc(cc(n1)NC(=O)NS(=O)(=O)c1cc(c(s1)CCOC)C)OC,270,">20,000",,,,,,
12,O=C(NC)C1=C2N(N=C1)C(C3NCCC3)=CC=N2,"32,000",">84,000",,,,,,
13,CCC(=O)N1CCCc2cc(ccc21)NS(=O)(=O)c1ccc(cc1C)F,"3,000","74,000",,,,,,
14,COc1ccc2c(c1)N(CCC2)CCCNC(=O)c1cccc2c1N[C@H](C)C(=O)N2,580,"13,000",,,,,,
15,CCC(=O)N1CCOc2c(cc(cc2OC[C@H]2CCCN(C)C2)-c2ccc(c(c2)OC)OC)C1,440,"15,000",,,,,,
16,CNC(=O)c1c[nH]c2ccc(cc12)N1CCCc2cc(c(cc21)C(F)F)-c1cnn(c1)C,9.5,"12,000",,,47,20,13,"2,200"
17,CN1C(=O)Sc2ccc(cc21)N1CCCc2cc(c(cc21)C(F)F)-c1cnn(c1)C,69,"18,000",,,71,39,17,
18,CNC(=O)c1ccc2nccc(c2c1)N1CCCc2cc(c(cc21)C(F)F)-c1cnn(c1)C,34,">20,000",,,,,,
19,CN1C(=O)C(=CC2=C1CCN(C2)C(=O)C)N1CCCc2cc(c(cc21)C(F)F)-c1cnn(c1)C,47,">20,000",,,,,,
20,CN1C(=O)CCc2ccc(cc21)N1CCCc2cc(c(cc21)C(F)F)-c1cnn(c1)C,38,">20,000",,,,,,
21,CNC(=O)Nc1cc(cc(n1)N1CCCc2cc(c(cc21)C(F)F)-c1cnn(c1)C)OC,120,">20,000",,,,,,
22,CNC(=O)c1cnn2ccc(nc12)N1CCCc2cc(c(cc21)C(F)F)-c1cnn(c1)C,"1,400",">20,000",,,,,,
23,CC(=O)N1CCCc2cc(ccc21)N1CCCc2cc(c(cc21)C(F)F)-c1cnn(c1)C,450,"6,900",,,,,,
24,C[C@H]1Nc2c(cccc2N2CCCc3cc(c(cc32)C(F)F)-c2cnn(c2)C)NC1=O,61,">20,000",,,,,,
25,CNC(=O)N1CCOc2ccc(cc2C1)N1CCCc2cc(c(cc21)C(F)F)-c1cnn(c1)C,13,"7,400",,,,,,
26,CN1C(=O)N(C)c2cc(ccc21)N1CCCc2cc(c(cc21)C(F)F)-c1cnn(c1)C,20,"4,100",,,61,38,16,"1,000"
27,CN1C(=O)N(C)c2c1cc(cc2N1CCOCC1)N1CCCc2cc(c(cc21)C(F)F)-c1cnn(c1)C,3.6,"1,100",,,48,23,15,12
28,CNC(=O)c1c[nH]c2cnc(cc12)N1CCCc2cc(c(cc21)C(F)F)-c1cnn(c1)C,5.0,"3,900",,,39,17,6.9,360
29,CNC(=O)c1c[nH]c2c(nc(cc12)N1CCCc2cc(c(cc21)C(F)F)-c1cnn(c1)C)C(C)C,2.2,"2,300",,,50,25,13,53
